# Supplementary material for: Identification of Crucial Genes and Regulatory Pathways in Alfalfa against Fusarium Root Rot
Source: MDPI journal article supplement (doi:10.3390/plants12203634), 2023-10-21
Supplement: s1 [file s1]

# Supplementary Material

Supplementary Table S1

| Serial Number | Gene Id          | Primer  | Sequence (5'→3')      |
|---------------|------------------|---------|-----------------------|
| 1             | MsG0580028496.01 | 1-2F    | GATTCCGTTTGTTCTGGGC   |
|               |                  | 1-2R    | AGCTCCTTCAGGCATTTCCC  |
| 2             | MsG0480022079.01 | 2-1F    | CTGGCACAGACAAGGCAATC  |
|               |                  | 2-1R    | AGTTTTTGACACCCTTGGTGG |
| 3             | MsG0280011264.01 | 3-1F    | TCACACCAATGACGCAAGGA  |
|               |                  | 3-1R    | AGGGAGCTCCAATTGATGGC  |
| 4             | MsG0580028497.01 | 4-1F    | AGACCCAGAAGCATGGAAGG  |
|               |                  | 4-1R    | TTCGTCCAGAACCAAACGGA  |
| 5             | MsG0880044995.01 | 5-1F    | AGTTGCCTGAGGAGAAACGG  |
|               |                  | 5-1R    | AATTCGCCATAGCCCACTCC  |
| 6             | MsG0080048712.01 | 6-1F    | AGTGTCACATGGCGTCTCTT  |
|               |                  | 6-1R    | GTTCCACCCATGTCAATTGCC |
| 7             | MsG0280010711.01 | 7-1F    | TGGGGAAAATGGGTTGCTGA  |
|               |                  | 7-1R    | ACTTAAACGCCTCGCGATCA  |
| 8             | MsG0780040711.01 | 8-2F    | CGCGCTAAGCGAGAGTATGA  |
|               |                  | 8-2R    | AGTCCCCTTTTTCACCACCG  |
| 9             | MsG0180004956.01 | 9-1F    | AATCTTCGCCGGCAATTCTTG |
|               |                  | 9-1R    | CTCCGAGGCTGCGGATTATG  |
| 10            | MsG0780041774.01 | 10-1F   | GTTGGGTTGCATAGAGGTCC  |
|               |                  | 10-1R   | GCCCAGCTCTTTTGGAAAGTG |
| 11            | MsG0280011105.01 | 11-1F   | AATGTTTGACCGCAACGACG  |
|               |                  | 11-1R   | CCACACATCCATCTCGGTTCA |
| 12            | MsG0380015289.01 | 12-2F   | CGGTGGAGATACGAAGGAGC  |
|               |                  | 12-2R   | AGCATTTCTCCCCACAACCG  |
| 13            | MsG0480021441.01 | 13-2F   | TTTGCTGTTTGCGTGGAAG   |
|               |                  | 13-2R   | TCGGCTACATGAGCGACATC  |
| 14            | MsG0480021442.01 | 14-2F   | ACACTCGCGATGGAAGTTCA  |
|               |                  | 14-2R   | ACGTTGCAAGGTTTATGGCA  |
| 15            | MsG0580025278.01 | 15-1F   | AACTTCGTTCCGGCGACTTA  |
|               |                  | 15-1R   | CGCCATCACCGTTTCAACTT  |
| 16            | β-Actin          | actin-F | TTCCCCGGCATTGCTGATAG  |
|               |                  | actin-F | GGAGCCTCCAATCCAGACAC  |

Supplementary Table S2

| Sample  | Raw Data |       | Valid Data |       | Valid Ratio<br>(reads) | Q20%  | Q30%  | GC content% |
|---------|----------|-------|------------|-------|------------------------|-------|-------|-------------|
|         | Read     | Base  | Read       | Base  |                        |       |       |             |
| TMSR0-1 | 53351904 | 8.00G | 51139572   | 7.67G | 95.85                  | 99.98 | 98.64 | 43          |
| TMSR0-2 | 50174422 | 7.53G | 47419192   | 7.11G | 94.51                  | 99.98 | 98.58 | 43          |
| TMSR0-3 | 52924752 | 7.94G | 50294942   | 7.54G | 95.03                  | 99.99 | 98.64 | 43          |
| TMSR2-1 | 51936792 | 7.79G | 45789964   | 6.87G | 88.16                  | 99.98 | 98.57 | 44          |
| TMSR2-2 | 54790248 | 8.22G | 48751414   | 7.31G | 88.98                  | 99.98 | 98.56 | 45          |
| TMSR2-3 | 49235432 | 7.39G | 45589510   | 6.84G | 92.59                  | 99.99 | 98.64 | 43          |
| TMSR3-1 | 51617928 | 7.74G | 48364274   | 7.25G | 93.70                  | 99.99 | 98.68 | 43          |
| TMSR3-2 | 48395024 | 7.26G | 45867894   | 6.88G | 94.78                  | 99.99 | 98.65 | 43          |
| TMSR3-3 | 55419402 | 8.31G | 51441560   | 7.72G | 92.82                  | 99.98 | 98.57 | 44          |
| TMSS0-1 | 51333708 | 7.70G | 48780436   | 7.32G | 95.03                  | 99.98 | 98.51 | 43          |
| TMSS0-2 | 51769540 | 7.77G | 49588546   | 7.44G | 95.79                  | 99.99 | 98.61 | 43          |
| TMSS0-3 | 52189892 | 7.83G | 49747756   | 7.46G | 95.32                  | 99.98 | 98.54 | 43          |
| TMSS2-1 | 52871826 | 7.93G | 50644682   | 7.60G | 95.79                  | 99.98 | 98.52 | 43          |
| TMSS2-2 | 54685124 | 8.20G | 51991892   | 7.80G | 95.08                  | 99.98 | 98.50 | 43          |
| TMSS2-3 | 50675668 | 7.60G | 48233210   | 7.23G | 95.18                  | 99.99 | 98.56 | 43          |
| TMSS3-1 | 54920434 | 8.24G | 50225292   | 7.53G | 91.45                  | 99.99 | 98.64 | 42          |
| TMSS3-2 | 53221384 | 7.98G | 50496290   | 7.57G | 94.88                  | 99.99 | 98.60 | 43          |
| TMSS3-3 | 36398586 | 5.46G | 34369922   | 5.16G | 94.43                  | 99.99 | 98.57 | 43          |
